# Supplementary material
Source: PubMed Central journal article supplement (PMC1317924)

A

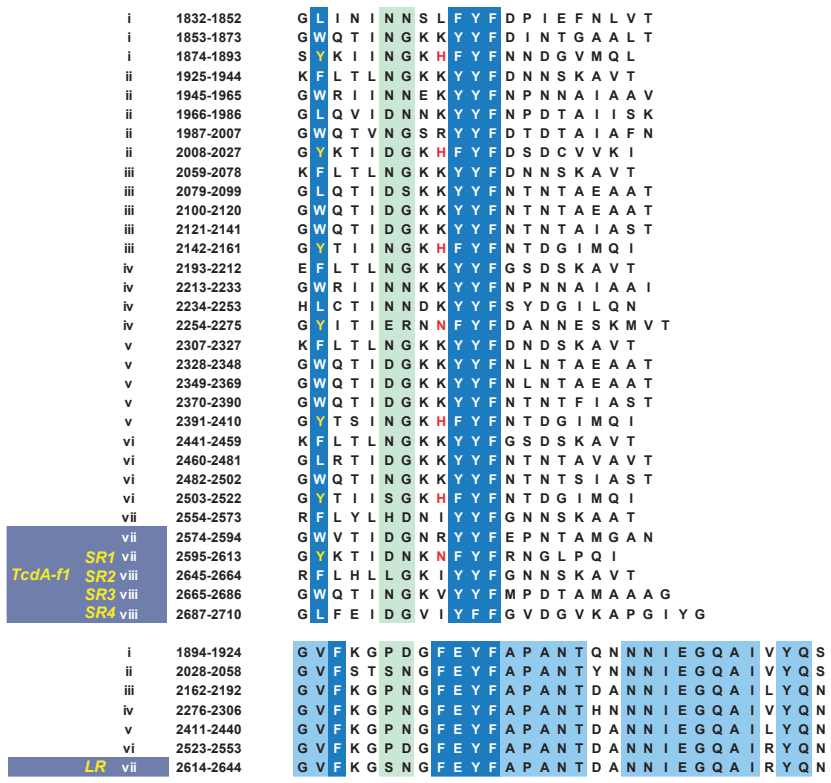

B

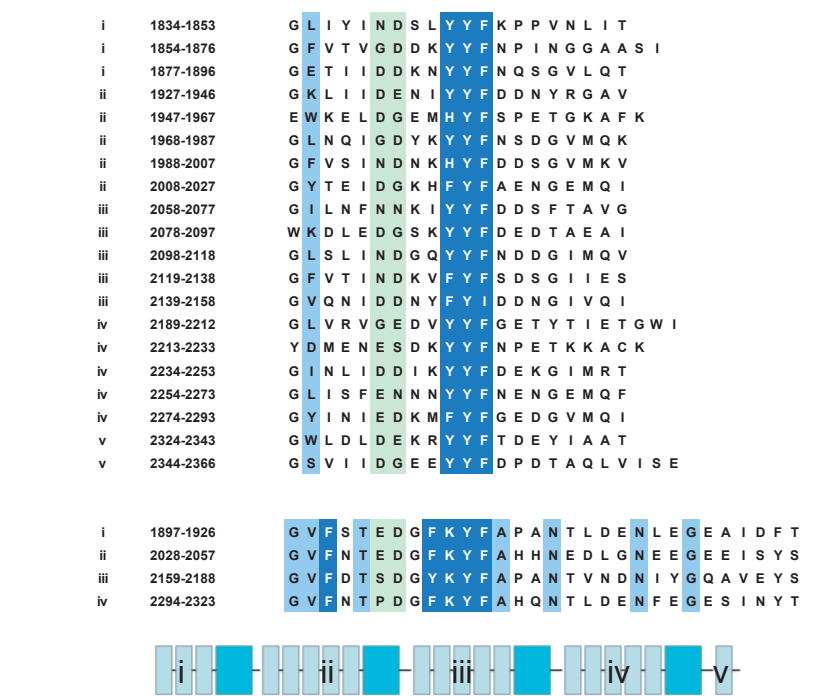

Supplement: pnas_0506391102_1.pdf [file pnas_0506391102_1.pdf]

A

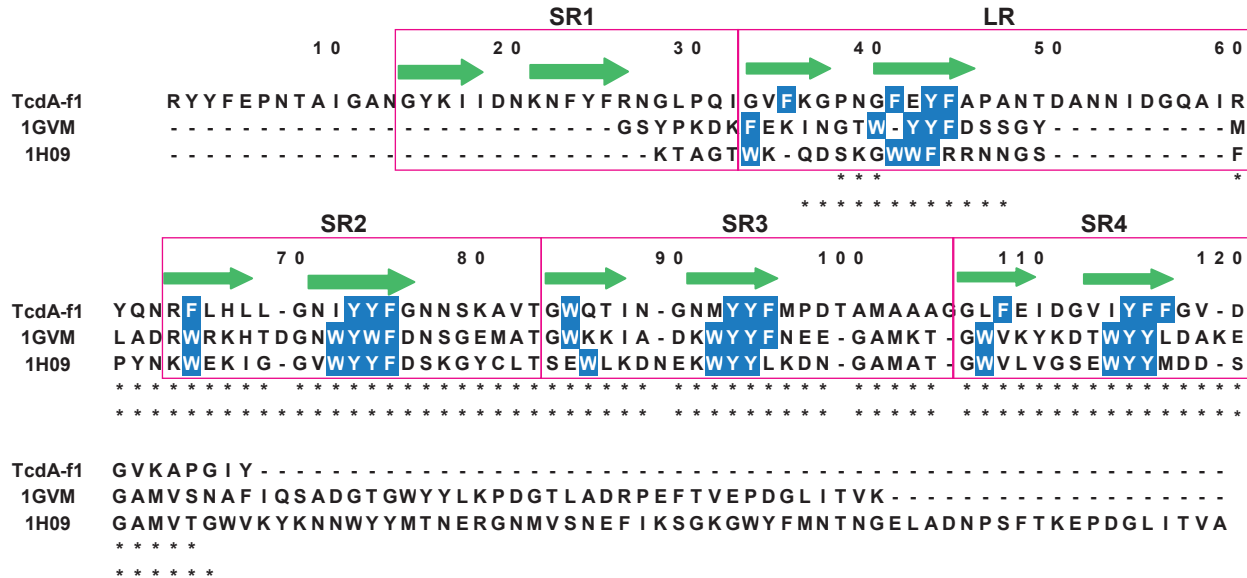

B

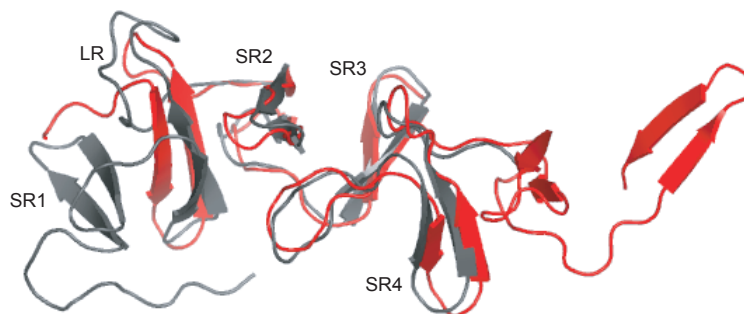

C

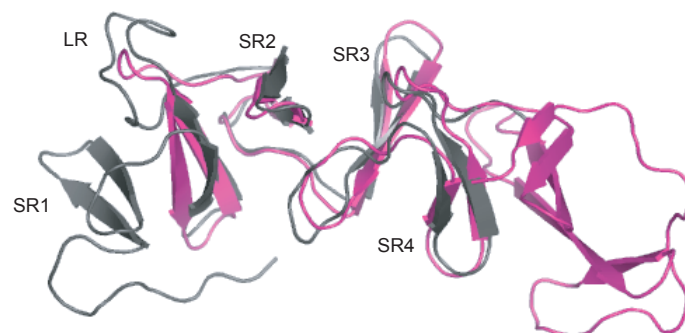

D

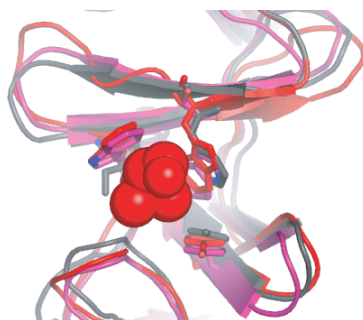

Supplement: pnas_0506391102_2.pdf [file pnas_0506391102_2.pdf]
